# Supplementary material for: Effect and Interaction of β-Lactoglobulin, Kappa Casein, and Prolactin Genes on Milk Production and Composition of Awassi Sheep
Source: MDPI journal article supplement (doi:10.3390/ani9060382), 2019-06-21

## Supplemental material

**Figure S1:**  $\kappa$ -casein (CSN3) gene PCR product, lanes 1 and 2 is the 680bp PCR product and L50: Ladder 50bp

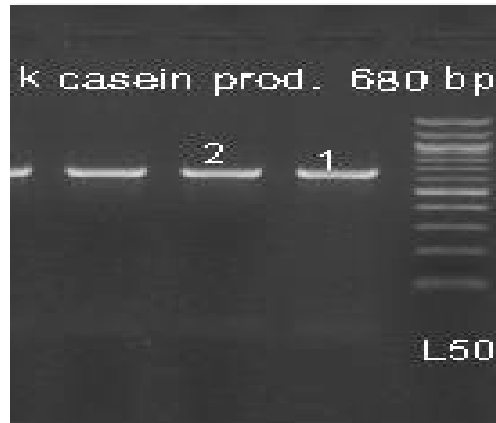

**Figure S2:** Sequencing of Kappa Casein and  $\beta$ -Lactoglobulin in Awassi sheep. Panel I. Kappa casein SNP rs407795524 mutation detected by sequencing in Awassi sheep A: TC, B: TT and C: CC located at Chr. No: 6:85316423bp; Panel II: Rs430610497 mutation that located at 1373bp in Awassi sheep exon 2 of  $\beta$ -Lactoglobulin gene A: Heterozygous TC, B: CC and C: TT genotype.

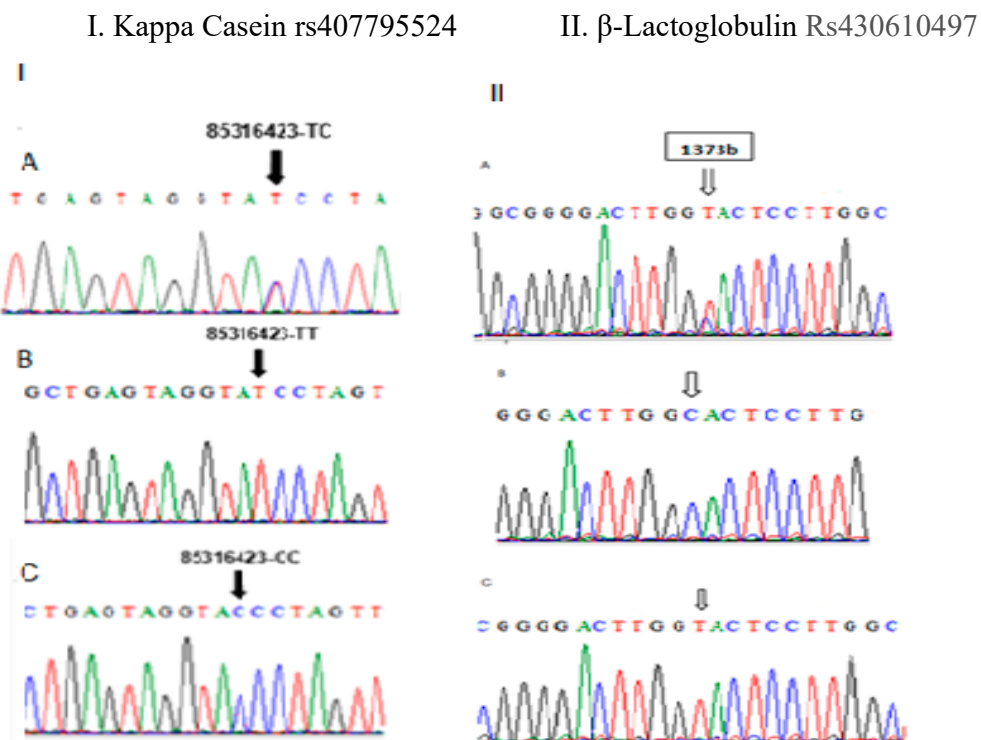

Supplement: s1 [file s1]
